# Supplementary material for: The Effectiveness of Personalized Nursing on Quality of Life in Cardiovascular Disease Patients: A Systematic Review and Meta‐analysis
Source: Hindawi journal article supplement (doi:10.1155/2023/4689732), 2023-01-01
Supplement: f1 [file 4689732.f1.zip]

| Step | Search Strategy                                                                                                                       |
|------|---------------------------------------------------------------------------------------------------------------------------------------|
| #1   | <b>'cardiovascular disease'/exp</b>                                                                                                   |
| #2   | <b>'cardiovascular disease':ab,ti OR 'disease, cardiovascular':ab,ti OR 'diseases, cardiovascular':ab,ti</b>                          |
| #3   | <b>#1 OR #2</b>                                                                                                                       |
| #4   | <b>'empathy'/exp</b>                                                                                                                  |
| #5   | <b>nursing':ab,ti OR 'nursings':ab,ti OR 'compassion':ab,ti OR 'caring':ab,ti</b>                                                     |
| #6   | <b>#4 OR #5</b>                                                                                                                       |
| #7   | <b>'quality of life'/exp</b>                                                                                                          |
| #8   | <b>'life quality':ab,ti OR 'health-related quality of life':ab,ti OR 'health related quality of life':ab,ti OR 'hrqol':ab,ti</b>      |
| #9   | <b>#7 OR #8</b>                                                                                                                       |
| #10  | <b>'randomized controlled trial':ab,ti OR 'randomized':ab,ti OR 'placebo':ab,ti</b>                                                   |
| #11  | <b>#9 AND (2011:py OR 2012:py OR 2013:py OR 2014:py OR 2015:py OR 2016:py OR 2017:py OR 2018:py OR 2019:py OR 2020:py OR 2021:py)</b> |

embase

#12

#3 AND #6 AND #9 AND #10

#13

#12 AND (**2011:py** OR **2012:py** OR **2013:py** OR **2014:py**  
OR **2015:py** OR **2016:py** OR **2017:py** OR **2018:py** OR  
**2019:py** OR **2020:py** OR **2021:py**)
